# Supplementary material for: Suicide and Other-Cause Mortality after Early Exposure to Smoking and Second Hand Smoking: A 12-Year Population-Based Follow-Up Study
Source: PLoS One. 2015 Jul 29;10(7):e0130044. doi: 10.1371/journal.pone.0130044 (PMC4519334; doi:10.1371/journal.pone.0130044)
Supplement: S1 Table — (DOCX) [file pone.0130044.s001.docx]

**Supporting Information**

S1 Table. Cox proportional hazards regression analyses of factors associated with combined suicide and undetermined-cause unnatural mortality

| Characteristic | Associations with suicide/undetermined mortality – hazard ratios (95% CI) displayed for simultaneously entered covariates | | | | |
| --- | --- | --- | --- | --- | --- |
|  | Unadjusted | Adjusted model 1a | Adjusted model 2 b | Adjusted model 3 c | Adjusted model 4 d |
| Male/female | 1.64 (1.14, 2.35) | 1.63 (1.12, 2.35) | 1.48 (1.02, 2.16) | 1.44 (0.99, 2.09) | 1.44 (0.99, 2.10) |
| Age, y | 1.14 (0.93, 1.39) | 1.10 (0.89, 1.35) | 1.05 (0.86, 1.29) | 1.07 (0.87, 1.31) | 1.07 (0.87, 1.31) |
| The highest education of parents |  |  |  |  |  |
| 1 (primary school/illerate) | Reference | Reference | Reference | Reference | Reference |
| 2 (high school) | 1.01 (0.65, 1.58) | 1.03 (0.66, 1.61) | 1.07 (.68, 1.67) | 1.04 (0.67, 1.63) | 1.04 (0.66, 1.63) |
| 3 (college or higher) | 0.85 (0.47, 1.55) | 0.94 (0.51, 1.76) | 1.00 (0.54, 1.87) | 0.94 (0.50, 1.76) | 0.94 (0.50, 1.76) |
| SHS (cigarettes) |  |  |  |  |  |
| 0 | Reference | Reference | Reference | Reference | Reference |
| >0, <=20 | 1.43 (0.96, 2.12) | 1.39 (0.93, 2.08) | 1.33 (0.88, 1.99) | 1.33 (0.88, 1.99) | 1.33 (0.88, 1.99) |
| >20 | 3.07 (1.78, 5.30) | 3.00 (1.73, 5.21) | 2.61 (1.49, 4.58) | 2.55 (1.45, 4.48) | 2.56 (1.46, 4.50) |
| Current smoking (yes/no) | 5.57 (3.25, 9.56) |  | 3.52 (1.92, 6.46) | 3.34 (1.82, 6.13) | 3.81 (1.97, 7.36) |
| Asthma, lifetime (yes/no) | 2.12 (1.46, 3.10) | … | … | 2.04 (1.38, 3.02) | 2.05 (1.38, 3.03) |
| Allergic rhinitis (yes/no) | 1.31 (0.91, 1.86) | … | … | 1.12 (0.77, 1.62) | 1.12 (0.77, 1.62) |
| Alcoholic drinking (yes/no) | 1.93 (0.71, 5.23) | … | … | … | 0.63 (0.21, 1.88) |

Note. HR=hazard ratio; CI=confidence interval; AHR=adjusted hazard ratio

aAdjusted for gender, age, SHS exposure and the highest education of parents, bAdjusted for gender, age, the highest education of parents, SHS exposure and cigarette smoking, cAdjusted for gender, age, the highest education of parents, SHS exposure, cigarette smoking, the lifetime asthma, and allergic rhinitis, dAdjusted for gender, age, the highest education of parents, SHS exposure, cigarette smoking, the lifetime asthma, allergic rhinitis, and alcoholic drinking, *p<0.05, **p<0.01, ***p<0.001
